# Supplementary material for: Computer-Tailored Decision Support Tool for Lung Cancer Screening: Community-Based Pilot Randomized Controlled Trial
Source: PubMed Central journal article supplement (PMC7671845; doi:10.2196/17050), 2020-11-03

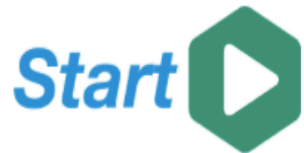

*Welcome to  
Lung Talk!*

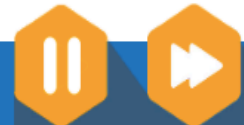

## About You...

### Welcome

Introduction

Your Lungs

**About You...**

Please tell us if you currently smoke or have quit smoking?

I currently smoke

I quit smoking

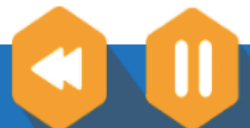

# Cigarette Smoke: What It Does

- Welcome
- Lung Diseases
  - Cigarette Smoke**
  - Lung Cancer
  - No Symptoms
  - Symptoms
- Talk About It
- Summary

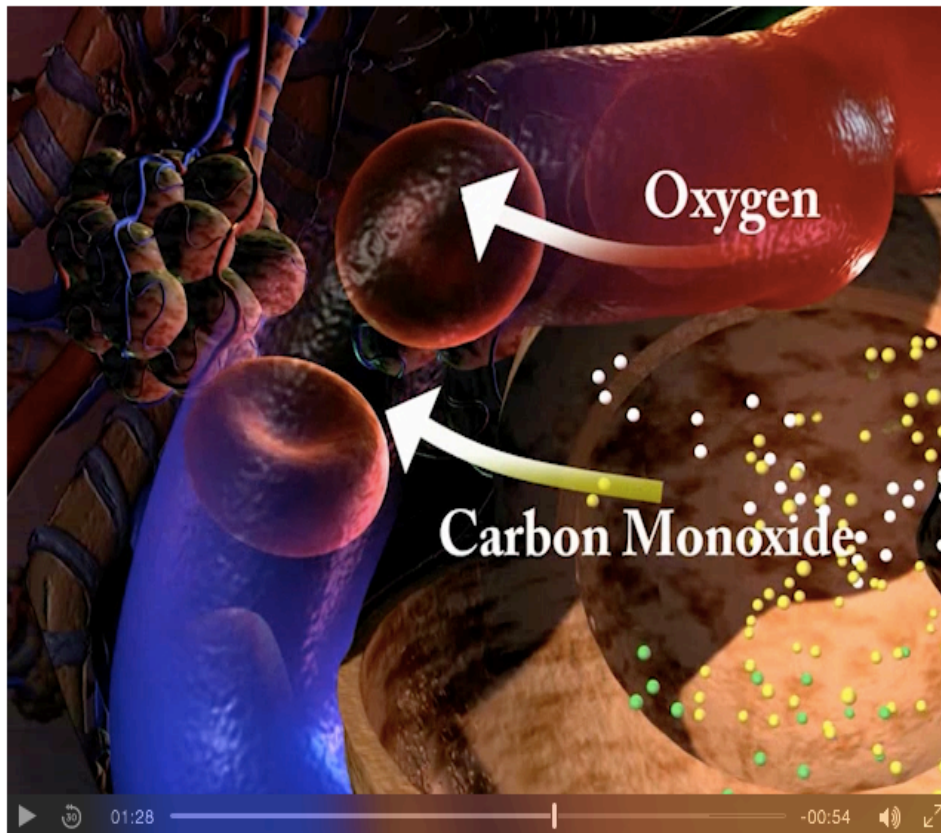

Emphysema

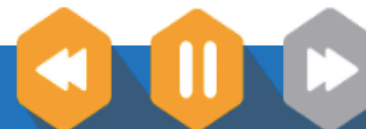

# Cigarette Smoke: What It Does

- Welcome
- Lung Diseases
  - Cigarette Smoke**
  - Lung Cancer
  - No Symptoms
  - Symptoms
- Talk About It
- Summary

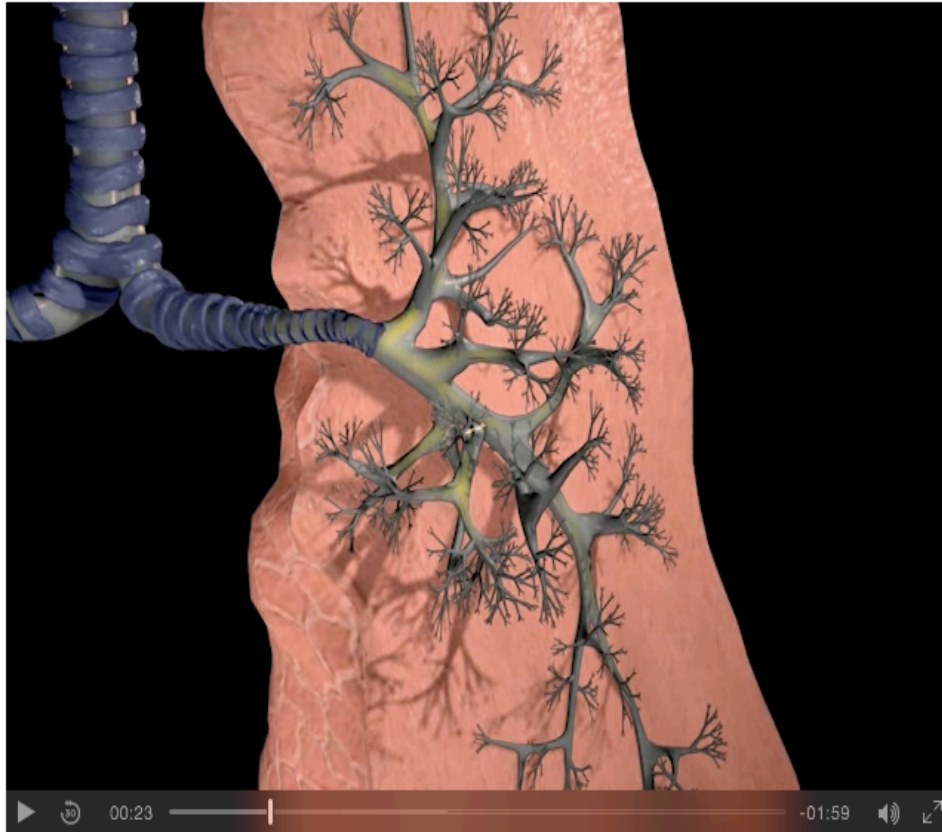

Emphysema

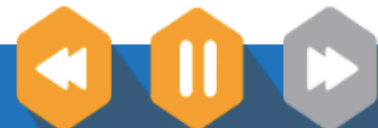

# Lung Scan

Welcome

Lung Diseases

Talk About It

Lung Screening

**Lung Scan**

Benefits

Things to Consider

Possible Results

Summary

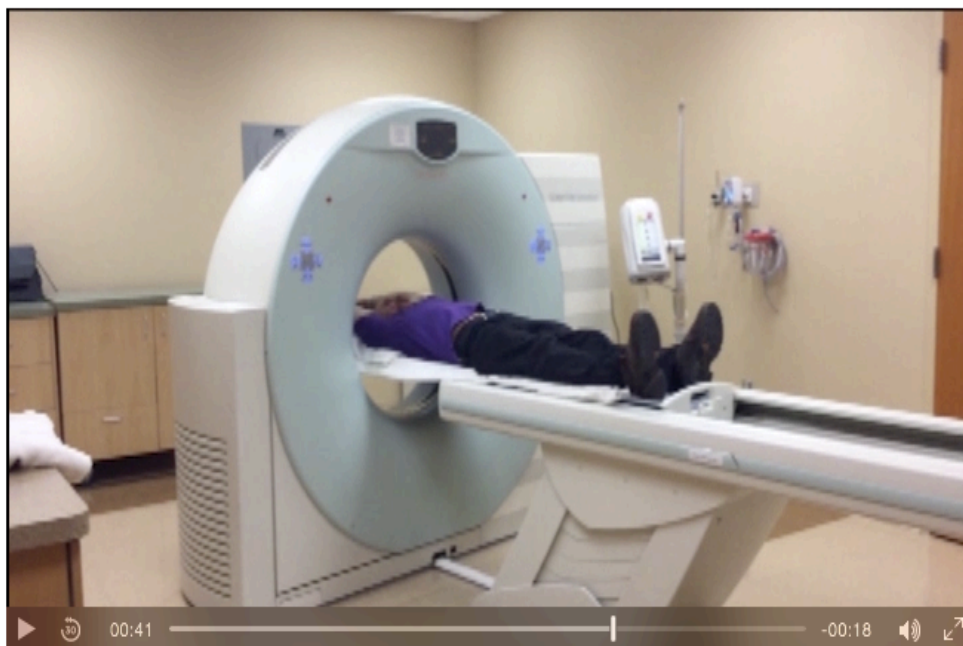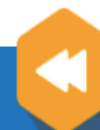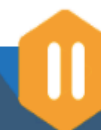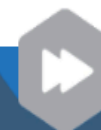

## What I Would Like To Talk About

Welcome

Lung Diseases

Talk About It

Summary

**To Talk About**

LungTalk Printout

More Information

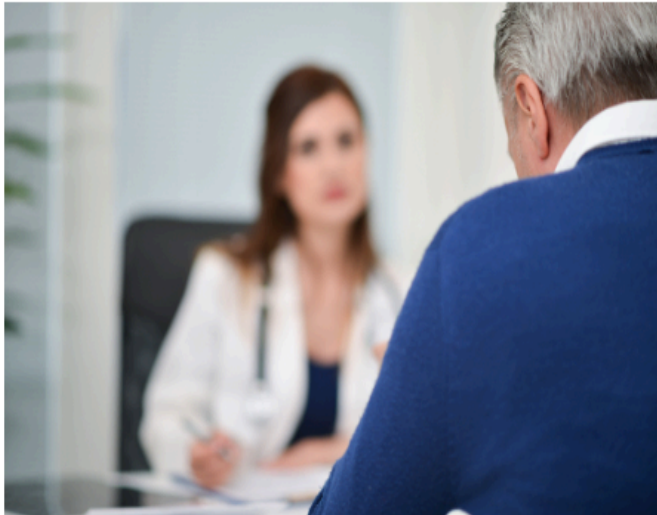

I would like to talk about (choose up to 3):

- My personal risk of lung cancer.
- More information about the lung scan.
- Benefits of lung screening.
- False positives, over-diagnosis, and radiation exposure.
- What my doctor recommends for me.
- How long I would have to do yearly lung scans.
- Ways to stop smoking.
- Other

Please click the right arrow when you are ready.



Supplement: jmir_v22i11e17050_app1.pdf [file jmir_v22i11e17050_app1.pdf]
